# Supplementary figures and images for: The Lethal and Sublethal Effects of Lambda-Cyhalothrin and Emamectin Benzoate on the Soybean Pest Riptortus pedestris (Fabricius)
Source: MDPI journal article supplement (doi:10.3390/toxics11120971), 2023-11-30

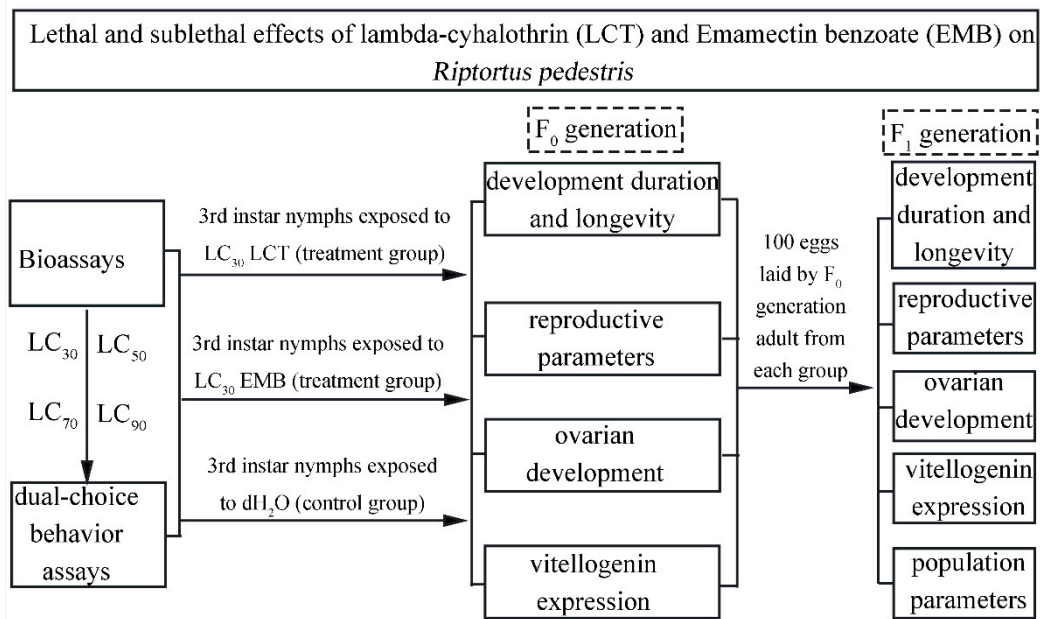

**Figure S1.** The experimental methodology flow.

Supplement: s1 [file s1]
